# Supplementary material for: Standalone cell culture microfluidic device-based microphysiological system for automated cell observation and application in nephrotoxicity tests
Source: Royal Society of Chemistry journal article supplement (doi:10.1039/d3lc00934c), 2023-12-22
Supplement: d3lc00934c2.pdf [file d3lc00934c2.pdf]

## **Supplementary Information for**

### **Standalone cell culture microfluidic device-based microphysiological system for automated cell observation and application in nephrotoxicity tests**

Hiroshi Kimura<sup>\*a</sup>, Hiroko Nakamura<sup>a</sup>, Tomomi Goto<sup>a</sup>, Wakana Uchida<sup>b</sup>, Takayuki Uozumi<sup>b</sup>, Daniel Nishizawa<sup>a</sup>, Kenta Shinha<sup>a</sup>, Junko Sakagami<sup>b</sup>, Kotaro Doi<sup>c</sup>

<sup>a</sup>Micro/Nano Technology Center, Tokai University, Kanagawa, JAPAN 259-1292

<sup>b</sup>Nikon Corporation, Kanagawa, JAPAN

<sup>c</sup>Institute of Industrial Science, The University of Tokyo, Tokyo, JAPAN 153-8505

\*To whom correspondence may be addressed. Email: [hkimura@tokai-u.jp](mailto:hkimura@tokai-u.jp)

#### **This PDF file includes:**

Figures S1 to S3

Table S1

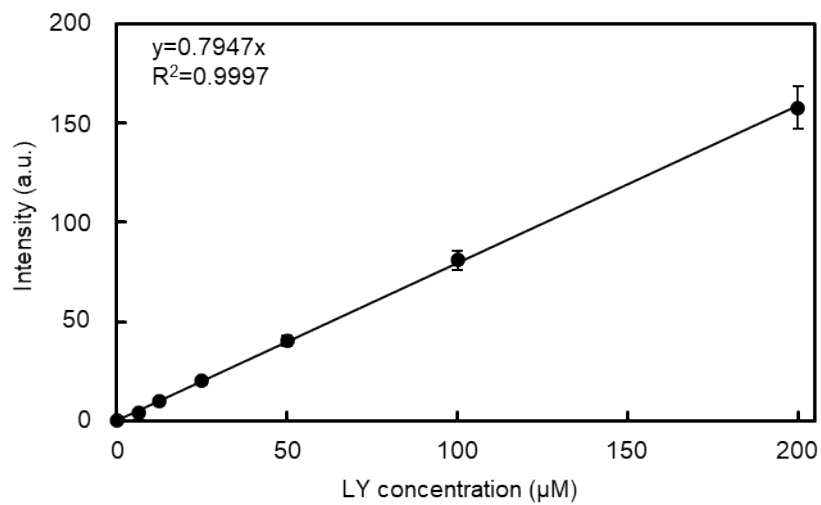

**Fig. S1** Graph and calibration curve of fluorescence intensity versus concentration change in Lucifer yellow (LY) obtained using the standalone cell culture microfluidic device and the BioStation CT-based automatic cell imaging system.

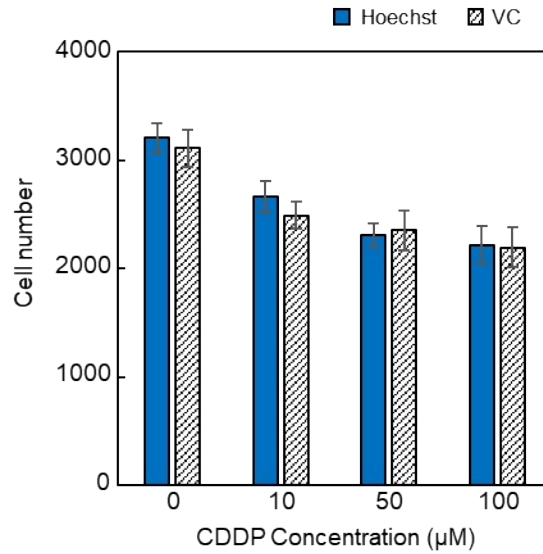

**Fig. S2** Cell counts of renal proximal tubular epithelial cells during cisplatin (CDDP) exposure are compared between the volume contrast (VC) method and fluorescent images obtained using Hoechst staining. Under both conditions, the error in cell counts measured using the VC method is less than 10% of the value obtained by counting the number of nuclei with Hoechst staining. The high reliability of the method proposed in this study for evaluating cell counts by automatic segmentation from VC images has been verified.

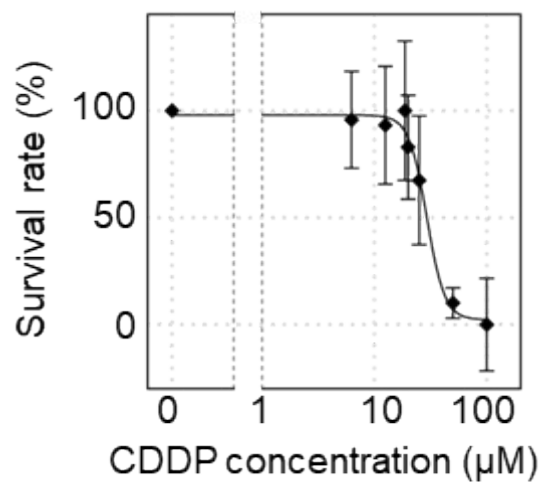

**Fig. S3** Cisplatin (CDDP) toxicity study results using the conventional method through cell culture inserts. In this experiment, the conditions including the extracellular matrix coating and RPTEC/TERT1 cell seeding, and incubation period are the same as those in the standalone cell culture microfluidic device experiment. After 3 days of exposure to CDDP, cell viability is measured. The median effect concentration ( $EC_{50}$ ) value of CDDP obtained from the results of this experiment is 29.3  $\mu\text{M}$ .

**Table S1** TaqMan probes used for quantitative real-time PCR

| Gene aliases       | Gene symbol    | Assay ID (gene expression assay reference) |
|--------------------|----------------|--------------------------------------------|
| <i>MATE1</i>       | <i>SLC47A1</i> | Hs00217320_m1                              |
| <i>MATE2K</i>      | <i>SLC47A2</i> | Hs00945652_m1                              |
| <i>P-gp/MDR1</i>   | <i>ABCB1</i>   | Hs00184500_m1                              |
| <i>Aquaporin-1</i> | <i>AQP1</i>    | Hs01028916_m1                              |
| <i>E-cadherin</i>  | <i>CDH1</i>    | Hs01023895_m1                              |
| <i>PPIA</i>        | <i>CYPA</i>    | Hs04194521_s1                              |

PCR, polymerase chain reaction

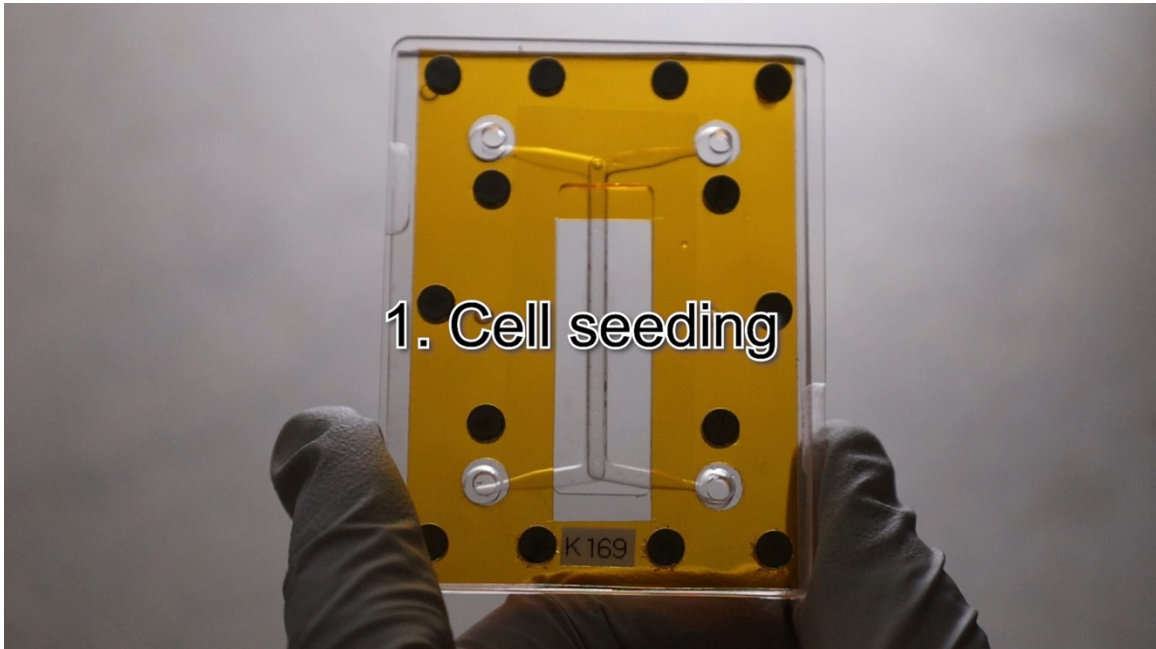

**Movie S1** Operations of the standalone cell culture microfluidic device (SCCMD) for perfusion culture

## Introduction to BioStation CT

**Movie S2** Standalone cell culture microfluidic device (SCCMD), which is stored in the storage racks, moved using the transport unit, and observed at the observation stage in the BioStation CT-based cell-culture observation system.
